# Supplementary material for: Anti-TNF Therapy Reduces Serum Levels of Chemerin in Rheumatoid Arthritis: A New Mechanism by Which Anti-TNF Might Reduce Inflammation
Source: PLoS One. 2013 Feb 27;8(2):e57802. doi: 10.1371/journal.pone.0057802 (PMC3584053; doi:10.1371/journal.pone.0057802)
Supplement: Enrollment log S1 — Trial enrollment log including reason of drop out/harms. (XLS) [file pone.0057802.s002.xls]

## Sheet: Blad1
Enrollment log AMC-adalimumab cohort
patient nr	Start study	reason drop out / harms
001	2004-04-07	lack efficacy
002	2004-04-14
003	2004-04-14
004	2004-05-19
005	2004-06-02
006	2004-06-16
007	not
008	2004-07-14	side effects, flare arthritis, possible SLE
009	2004-07-21	Sudden death
010	2004-07-21
011	2004-07-28
012	2004-08-04
013	2004-08-02
014	2004-12-01
015	2004-09-29
016	2004-10-06
017	not
018	2004-10-13
019	2004-11-17
020	2004-10-20
021	2004-11-03
022	2004-11-10
023	2004-11-24
024	2004-12-08	lost to follow up, emigrated
025	2005-01-05
026	2004-12-29
027	2005-02-09
028	2005-02-02
029	2005-02-09
030	2005-02-16
031	2005-06-08	lung carcinoma
032	2005-03-09
033	2005-06-22
034	2005-03-23
035	2005-04-13
036	2005-04-14
037	2005-09-14
038	2005-05-19
039	not
040	2005-05-11
041	2005-06-09
042	2005-06-01
043	2005-05-25
044	2005-07-13
045	not
046	not
047	declined
048	2005-08-31
049	2005-08-17
050	2005-08-17
051	2005-09-21
052	2005-10-27
053	2005-10-12	serum not in storage
054	not
055	2005-11-09
056	not
057	2005-12-28
058	declined
059	2006-01-10
060	2006-04-11
061	2006-02-01	drop out due to lack of efficacy
062	2006-02-01
063	2006-04-13
